# Supplementary material for: Solid electron acceptor effect on biocatalyst activity in treating azo dye based wastewater
Source: Royal Society of Chemistry journal article supplement (doi:10.1039/c5ra15648c), 2015-01-01
Supplement: c5ra15648c1.pdf [file c5ra15648c1.pdf]

1  
2  
3  
4  
5  
6  
7  
8  
9

## Solid Electron Acceptor Effect on Biocatalyst Activity in Treating Azo dye Based Wastewater

S. Sreelatha, G. Velvizhi, C. Nagendranatha Reddy, J. Annie Modestra,  
S.Venkata Mohan\*

Bioengineering and Environmental Sciences (BEES), CSIR-Indian Institute of Chemical  
Technology (CSIR-IICT), Hyderabad-500 007, India

\* Corresponding author: E-mail: vmohan\_s@yahoo.com; Tel/Fax: 0091-40-27191765

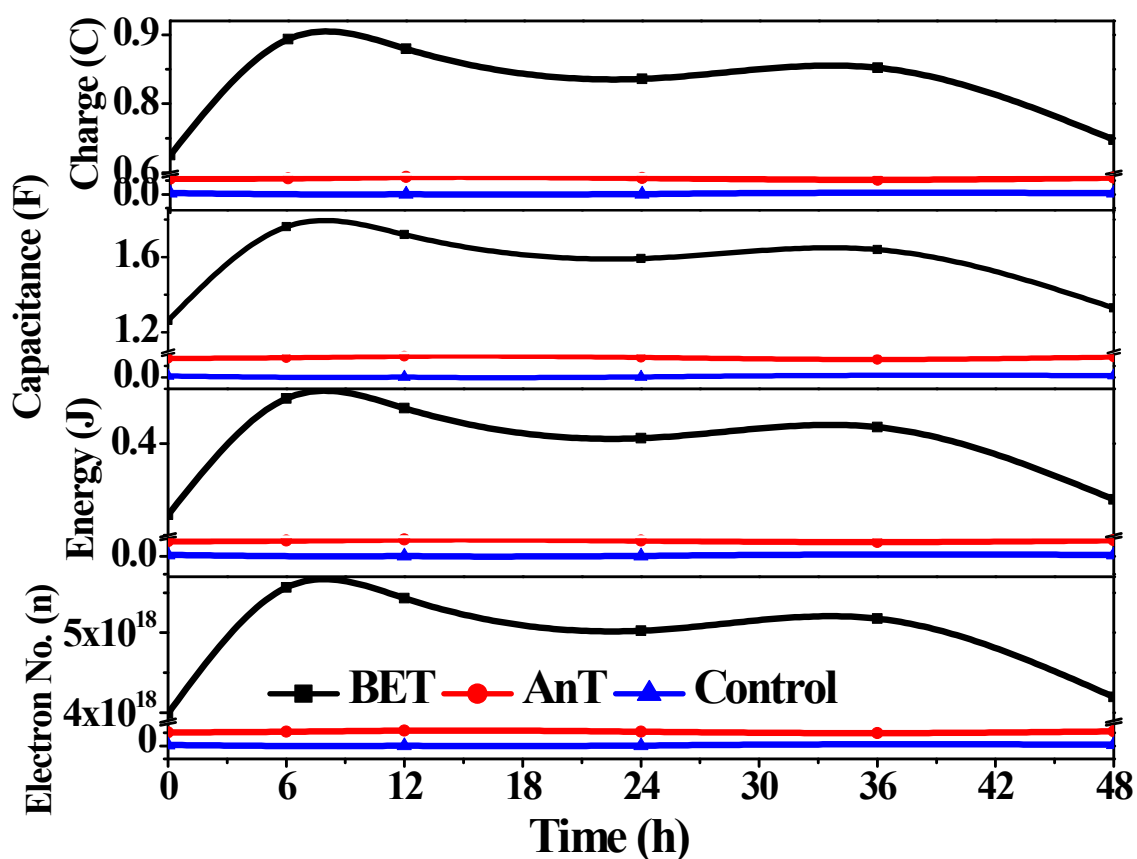

10  
11

Sfig1: Charge, Capacitance, Energy and No of electrons for BET, AnT and Control operations
